# Supplementary material
Source: PubMed Central journal article supplement (PMC1851597)
Supplement: pnas_0700638104_4.pdf [file pnas_0700638104_4.pdf]

**Table 1: Effect of RNAi-depletion of core proteasomal subunits on the lifespans of long-lived mutants and wild-type worms<sup>‡</sup>**

| Subunit                                                                    | Gene                 | Cosmid   | <i>daf-2(mu150)</i>        |                             |                                       | <i>glp-1(e2141ts)</i>      |                             |                                       | N2                         |                             |                                       |
|----------------------------------------------------------------------------|----------------------|----------|----------------------------|-----------------------------|---------------------------------------|----------------------------|-----------------------------|---------------------------------------|----------------------------|-----------------------------|---------------------------------------|
|                                                                            |                      |          | Mean LS<br>± SEM<br>(days) | Events/<br>Obs <sup>*</sup> | P value<br>vs<br>Control <sup>†</sup> | Mean LS<br>± SEM<br>(days) | Events/<br>Obs <sup>*</sup> | P value<br>vs<br>Control <sup>†</sup> | Mean LS<br>± SEM<br>(days) | Events/<br>Obs <sup>*</sup> | P value<br>vs<br>Control <sup>†</sup> |
| <b>1.A: RNAi-depletion of proteasome structural and enzymatic subunits</b> |                      |          |                            |                             |                                       |                            |                             |                                       |                            |                             |                                       |
|                                                                            | Control <sup>†</sup> |          | 34.2 ± 0.1                 | 77/89                       |                                       | 22.2 ± 0.9                 | 82/88                       |                                       | 20.7 ± 0.7                 | 42/88                       |                                       |
|                                                                            | <i>daf-16</i>        |          | 16.6 ± 0.4                 | 80/83                       | <0.0001                               | 17.8 ± 0.3                 | 77/87                       | <0.0001                               | 19.2 ± 0.2                 | 51/90                       | 0.01                                  |
| <b>19S Non-ATPase subunits</b>                                             |                      |          |                            |                             |                                       |                            |                             |                                       |                            |                             |                                       |
| Rpn1                                                                       | <i>rpn-1</i>         | T22D1.9  | <b>15.0 ± 0.2</b>          | 78/88                       | <0.0001                               | <b>15.8 ± 0.8</b>          | 87/93                       | <0.0001                               | <b>13.8 ± 0.2</b>          | 52/90                       | <0.0001                               |
| Rpn2                                                                       | <i>rpn-2</i>         | C23G10.4 | <b>15.3 ± 0.2</b>          | 83/88                       | <0.0001                               | <b>15.1 ± 0.2</b>          | 77/88                       | <0.0001                               | nt                         |                             |                                       |
| Rpn3                                                                       | <i>rpn-3</i>         | C30C11.2 | <b>16.3 ± 0.2</b>          | 83/89                       | <0.0001                               | <b>15.8 ± 0.3</b>          | 88/91                       | <0.0001                               | <b>13.2 ± 0.2</b>          | 69/92                       | <0.0001                               |
| Rpn5                                                                       | <i>rpn-5</i>         | F10G7.8  | 35.3 ± 0.7                 | 64/80                       | 0.55                                  | 23.8 ± 0.7                 | 66/89                       | 0.78                                  | nt                         |                             |                                       |
| Rpn6                                                                       | <i>rpn-6</i>         | F57B9.10 | <b>13.4 ± 0.1</b>          | 87/90                       | <0.0001                               | <b>13.9 ± 0.2</b>          | 89/89                       | <0.0001                               | <b>14.1 ± 0.2</b>          | 72/90                       | <0.0001                               |
| Rpn7                                                                       | <i>rpn-7</i>         | F49C12.8 | <b>14.2 ± 0.2</b>          | 82/87                       | <0.0001                               | <b>15.0 ± 0.2</b>          | 89/89                       | <0.0001                               | <b>13.1 ± 0.2</b>          | 75/90                       | <0.0001                               |
| Rpn8                                                                       | <i>rpn-8</i>         | R12E2.3  | <b>15.8 ± 0.2</b>          | 84/90                       | <0.0001                               | <b>14.8 ± 0.2</b>          | 88/90                       | <0.0001                               | <b>13.4 ± 0.2</b>          | 58/90                       | <0.0001                               |
| Rpn9                                                                       | <i>rpn-9</i>         | T06D8.8  | <b>32.2 ± 0.8</b>          | 79/84                       | 0.01                                  | <b>16.7 ± 0.3</b>          | 83/90                       | <0.0001                               | <b>13.7 ± 0.5</b>          | 55/75                       | 0.001                                 |
| Rpn10                                                                      | <i>rpn-10</i>        | B0205.3  | <b>32.6 ± 0.8</b>          | 89/91                       | 0.007                                 | <b>20.2 ± 0.4</b>          | 81/82                       | 0.0002                                | <b>18.1 ± 0.6</b>          | 70/90                       | 0.03                                  |
| Rpn11                                                                      | <i>rpn-11</i>        | K07D4.3  | <b>15.6 ± 0.2</b>          | 69/90                       | <0.0001                               | <b>13.7 ± 0.3</b>          | 88/90                       | <0.0001                               | <b>13.6 ± 0.2</b>          | 46/90                       | <0.0001                               |
| Rpn12                                                                      | <i>rpn-12</i>        | ZK20.5   | 36.7 ± 0.7                 | 85/90                       | 0.17                                  | <b>21.0 ± 0.6</b>          | 85/88                       | 0.007                                 | 19.0 ± 0.8                 | 56/90                       | 0.4                                   |
| <b>19S ATPase subunits</b>                                                 |                      |          |                            |                             |                                       |                            |                             |                                       |                            |                             |                                       |
| Rpt1                                                                       | <i>rpt-1</i>         | C52E4.4  | <b>15.0 ± 0.2</b>          | 86/88                       | <0.0001                               | <b>15.0 ± 0.2</b>          | 80/90                       | <0.0001                               | <b>13.2 ± 0.2</b>          | 49/90                       | <0.0001                               |
| Rpt2                                                                       | <i>rpt-2</i>         | F29G9.5  | 33.2 ± 0.8                 | 85/87                       | 0.07                                  | <b>21.0 ± 0.6</b>          | 84/87                       | 0.01                                  | nt                         |                             |                                       |
| Rpt3                                                                       | <i>rpt-3</i>         | F23F12.6 | <b>16.0 ± 0.2</b>          | 83/90                       | <0.0001                               | <b>14.2 ± 0.3</b>          | 88/88                       | <0.0001                               | nt                         |                             |                                       |
| Rpt4                                                                       | <i>rpt-4</i>         | F23F1.8  | <b>15.6 ± 0.2</b>          | 83/90                       | <0.0001                               | <b>12.8 ± 0.3</b>          | 88/88                       | <0.0001                               | <b>13.1 ± 0.1</b>          | 49/89                       | <0.0001                               |
| Rpt5                                                                       | <i>rpt-5</i>         | F56H1.4  | <b>15.1 ± 0.2</b>          | 78/88                       | <0.0001                               | <b>15.0 ± 0.2</b>          | 73/88                       | <0.0001                               | <b>12.7 ± 0.2</b>          | 48/90                       | <0.0001                               |
| Rpt6                                                                       | <i>rpt-6</i>         | Y49E10.1 | <b>15.8 ± 0.3</b>          | 54/59                       | <0.0001                               | <b>14.2 ± 0.6</b>          | 86/89                       | <0.0001                               | <b>12.8 ± 0.1</b>          | 77/91                       | <0.0001                               |

| Subunit                                         | Gene          | Cosmid     | <i>daf-2(mu150)</i>        |                             |                           | <i>glp-1(e2141ts)</i>      |                             |                           | N2                         |                             |                           |
|-------------------------------------------------|---------------|------------|----------------------------|-----------------------------|---------------------------|----------------------------|-----------------------------|---------------------------|----------------------------|-----------------------------|---------------------------|
|                                                 |               |            | Mean LS<br>± SEM<br>(days) | Events/<br>Obs <sup>+</sup> | P value<br>vs<br>Control† | Mean LS<br>± SEM<br>(days) | Events/<br>Obs <sup>+</sup> | P value<br>vs<br>Control† | Mean LS<br>± SEM<br>(days) | Events/<br>Obs <sup>+</sup> | P value<br>vs<br>Control† |
| <b>20S α-type subunits</b>                      |               |            |                            |                             |                           |                            |                             |                           |                            |                             |                           |
| α1                                              | <i>pas-1</i>  | C15H11.7   | 33.8 ± 0.7                 | 85/88                       | 0.008                     | 22.5 ± 0.8                 | 66/85                       | 0.78                      | 20.0 ± 0.7                 | 43/90                       | 0.5                       |
| α5                                              | <i>pas-5</i>  | F25H2.9    | 15.7 ± 0.2                 | 69/88                       | <0.0001                   | 14.8 ± 0.2                 | 65/90                       | <0.0001                   | 13.5 ± 0.1                 | 78/91                       | <0.0001                   |
| α6                                              | <i>pas-6</i>  | CD4.6      | 13.5 ± 0.2                 | 84/89                       | <0.0001                   | 13.2 ± 0.2                 | 89/90                       | <0.0001                   | 14.1 ± 0.1                 | 75/91                       | <0.0001                   |
| α7                                              | <i>pas-7</i>  | ZK945.2    | 34.0 ± 0.8                 | 84/89                       | 0.34                      | 21.1 ± 0.7                 | 87/88                       | 0.06                      | 21.1 ± 0.7                 | 75/90                       | 0.3                       |
| <b>20S β-type subunits</b>                      |               |            |                            |                             |                           |                            |                             |                           |                            |                             |                           |
| β2                                              | <i>pbs-2</i>  | C47B2.4    | 13.0 ± 0.1                 | 89/90                       | <0.0001                   | 14.0 ± 0.3                 | 83/86                       | <0.0001                   | 14.1 ± 0.1                 | 53/92                       | <0.0001                   |
| β3                                              | <i>pbs-3</i>  | Y38A8.2    | 11.9 ± 0.1                 | 79/81                       | <0.0001                   | 12.6 ± 0.3                 | 84/89                       | <0.0001                   | 14.1 ± 0.1                 | 77/90                       | <0.0001                   |
| β4                                              | <i>pbs-4</i>  | T20F5.2    | 12.2 ± 0.1                 | 65/89                       | <0.0001                   | 15.4 ± 0.2                 | 75/89                       | <0.0001                   | 14.3 ± 0.1                 | 72/88                       | <0.0001                   |
| β5                                              | <i>pbs-5</i>  | K05C4.1    | 12.5 ± 0.1                 | 87/90                       | <0.0001                   | 14.1 ± 0.3                 | 83/90                       | <0.0001                   | 14.5 ± 0.5                 | 63/90                       | <0.0001                   |
| β6                                              | <i>pbs-6</i>  | C02F5.9    | 16.9 ± 0.3                 | 81/86                       | <0.0001                   | 15.6 ± 0.2                 | 83/88                       | <0.0001                   | 20.1 ± 0.7                 | 53/89                       | 0.88                      |
| β7                                              | <i>pbs-7</i>  | F39H11.5   | 12.4 ± 0.1                 | 87/89                       | <0.0001                   | 14.9 ± 0.2                 | 67/78                       | <0.0001                   | 13.5 ± 0.1                 | 70/79                       | <0.0001                   |
| <b>1.B: RNAi-depletion of E3 Ligase Cullins</b> |               |            |                            |                             |                           |                            |                             |                           |                            |                             |                           |
|                                                 | Control†      |            | 28.8 ± 0.6                 | 68/90                       |                           | 22.4 ± 1.0                 | 82/85                       |                           | 18.6 ± 0.8                 | 70/88                       |                           |
|                                                 | <i>daf-16</i> |            | 15.6 ± 0.4                 | 87/89                       | <0.0001                   | 16.1 ± 0.3                 | 88/88                       | <0.0001                   | 16.4 ± 0.3                 | 51/90                       | 0.005                     |
|                                                 | <i>cul-1</i>  | D2045.6    | 21.5 ± 0.4                 | 84/89                       | <0.0001                   | 22.8 ± 0.8                 | 88/91                       | 0.78                      | 18.6 ± 0.8                 | 67/85                       | 0.8                       |
|                                                 | <i>cul-2</i>  | ZK520.4a   | 27.6 ± 0.6                 | 72/75                       | 0.14                      | 25.1 ± 0.9                 | 72/85                       | 0.41                      | 16.4 ± 0.6                 | 82/91                       | 0.4                       |
|                                                 | <i>cul-3</i>  | Y108G3AL.1 | 25.2 ± 0.3                 | 50/83                       | <0.0001                   | 20.9 ± 0.7                 | 87/89                       | 0.11                      | 19.7 ± 0.9                 | 72/93                       | 0.1                       |
|                                                 | <i>cul-4</i>  | F45E12.3   | 26.2 ± 0.5                 | 84/90                       | 0.002                     | 24.6 ± 1.0                 | 83/89                       | 0.42                      | 19.7 ± 0.9                 | 57/88                       | 0.1                       |
|                                                 | <i>cul-5</i>  | ZK856.1    | 27.7 ± 0.6                 | 83/91                       | 0.2                       | 26.5 ± 0.9                 | 89/92                       | 0.02                      | 21.3 ± 0.9                 | 68/87                       | 0.01                      |
|                                                 | <i>cul-6</i>  | K08E7.7    | 26.2 ± 0.6                 | 88/90                       | 0.007                     | 25.9 ± 1.0                 | 91/91                       | 0.03                      | 19.7 ± 0.8                 | 68/89                       | 0.2                       |

\*Some animals were censored as described in Materials and Methods.

†Control refers to worms exposed to empty vector plasmid without an RNAi insert.

**Red:** Lifespan suppression with  $P < 0.0001$

**Red:** Significant lifespan suppression but  $P > 0.0001$

**Green:** Enhancement of lifespan

nt: not tested

‡The proteasome is a multi-subunit complex comprising a 20S core capped on either side by a 19S complex. The 20S core includes the structural  $\alpha$  subunits and the enzymatic  $\beta$  subunits, whereas the 19S complex includes the ATPase Rpt subunits and the non-ATPase Rpn subunits. General proteasomal function was reduced by inactivating the structural and enzymatic subunits by RNAi. In most cases, RNAi-depletion caused a dramatic shortening of lifespan. The worms appeared unhealthy and quiescent soon after RNAi treatment, and did not resemble normal old animals in their appearance (data not shown). There were a few exceptions to this trend (e.g., *pas-7*, *rpn-9*). However, since inhibiting a significant majority of the general proteasomal subunits (~70% of the ones we tested) affected *daf-2(mu150)*, *glp-1(e2141ts)* and N2 worms similarly, this finding suggests that the proteasome is essential for the viability of adult animals.
