# Supplementary material
Source: PubMed Central journal article supplement (PMC1851597)
Supplement: pnas_0700638104_5.pdf [file pnas_0700638104_5.pdf]

**Table 2: Effect of *cul-1* and *skr-1/2* RNAi treatments on the lifespans of long-lived mutants and wild-type worms**

| Trial                      | Gene             | Mean Lifespan<br>± SEM (days) | Events/<br>Obs <sup>*</sup> | P value<br>vs. Control <sup>†</sup> | % effect on<br>lifespan <sup>‡‡</sup> |
|----------------------------|------------------|-------------------------------|-----------------------------|-------------------------------------|---------------------------------------|
| <b><i>daf-2(mu150)</i></b> |                  |                               |                             |                                     |                                       |
| 1. <sup>§,¶,‡</sup>        | Control          | 33.4 ± 0.7                    | 89/90                       |                                     |                                       |
|                            | <i>daf-16</i>    | 17.3 ± 0.5                    | 80/83                       | <0.0001                             | -48.3                                 |
|                            | <i>cul-1</i>     | 25.2 ± 0.4                    | 80/85                       | <0.0001                             | -24.5                                 |
|                            | <i>skr-1</i>     | 22.0 ± 0.5                    | 88/91                       | <0.0001                             | -34.1                                 |
|                            | <i>skr-2</i>     | 22.8 ± 0.4                    | 92/92                       | <0.0001                             | -31.7                                 |
|                            | 2.               | Control                       | 32.3 ± 0.5                  | 119/122                             |                                       |
|                            | <i>daf-16</i>    | 17.4 ± 0.3                    | 119/124                     | <0.0001                             | -46.1                                 |
|                            | <i>cul-1</i>     | 25.0 ± 0.4                    | 105/115                     | <0.0001                             | -22.6                                 |
|                            | <i>skr-1</i>     | 24.3 ± 0.4                    | 91/92                       | <0.0001                             | -24.7                                 |
|                            | <i>skr-2</i>     | 25.3 ± 0.3                    | 113/117                     | <0.0001                             | -21.6                                 |
| 3. <sup>**</sup>           | Control          | 28.8 ± 0.6                    | 68/90                       |                                     |                                       |
|                            | <i>daf-16</i>    | 15.6 ± 0.4                    | 87/89                       | <0.0001                             | -45.8                                 |
|                            | <i>cul-1</i>     | 21.5 ± 0.4                    | 84/89                       | <0.0001                             | -25.3                                 |
|                            | <i>skr-1</i>     | 22.7 ± 0.4                    | 72/85                       | <0.0001                             | -21.1                                 |
|                            | <i>skr-2</i>     | 16.0 ± 0.3                    | 85/90                       | <0.0001                             | -44.4                                 |
|                            | 4.               | Control                       | 37.8 ± 0.5                  | 80/91                               |                                       |
| <i>daf-16</i>              |                  | 17.8 ± 0.3                    | 92/92                       | <0.0001                             | -52.9                                 |
| <i>cul-1</i>               |                  | 30.8 ± 0.5                    | 85/89                       | <0.0001                             | -18.5                                 |
| <i>skr-1</i>               |                  | 26.3 ± 0.4                    | 77/78                       | <0.0001                             | -30.4                                 |
| <i>skr-2</i>               |                  | 26.1 ± 0.3                    | 84/87                       | <0.0001                             | -30.9                                 |
| <b>N2</b>                  |                  |                               |                             |                                     |                                       |
| 1. <sup>¶,‡</sup>          | Control          | 20.7 ± 0.7                    | 67/88                       |                                     |                                       |
|                            | <i>daf-16</i>    | 16.6 ± 0.5                    | 67/87                       | <0.0001                             | -19.8                                 |
|                            | <i>cul-1</i>     | 18.8 ± 0.6                    | 84/90                       | 0.3                                 | -9.1                                  |
|                            | <i>skr-1</i>     | 20.7 ± 0.7                    | 82/86                       | 0.71                                | ne                                    |
|                            | <i>skr-2</i>     | 21.4 ± 0.9                    | 67/81                       | 0.19                                | +3.3                                  |
|                            | 2. <sup>††</sup> | Control                       | 18.6 ± 0.8                  | 70/88                               |                                       |
| <i>daf-16</i>              |                  | 16.4 ± 0.3                    | 57/90                       | 0.005                               | -11.8                                 |
| <i>cul-1</i>               |                  | 18.6 ± 0.8                    | 67/85                       | 0.81                                | ne                                    |
| <i>skr-1</i>               |                  | 18.3 ± 0.7                    | 71/87                       | 0.74                                | -2.6                                  |
| <i>skr-2</i>               |                  | 18.8 ± 0.6                    | 74/89                       | 0.71                                | +1.07                                 |

| Trial                 | Gene            | Mean Lifespan<br>± SEM (days) | Events/<br>Obs <sup>*</sup> | P value<br>Vs. Control <sup>†</sup> | % effect on<br>lifespan <sup>‡</sup> |
|-----------------------|-----------------|-------------------------------|-----------------------------|-------------------------------------|--------------------------------------|
| <b>glp-1(e2141ts)</b> |                 |                               |                             |                                     |                                      |
| 1. <sup>††, ‡</sup>   | Control         | 22.4 ± 1.0                    | 82/85                       |                                     |                                      |
|                       | <i>daf-16</i>   | 16.1 ± 0.3                    | 88/88                       | <0.0001                             | -27.1                                |
|                       | <i>cul-1</i>    | 22.8 ± 0.8                    | 88/91                       | 0.78                                | +1.7                                 |
|                       | <i>skr-1</i>    | 21.8 ± 0.8                    | 88/91                       | 0.19                                | -2.6                                 |
|                       | <i>skr-2</i>    | 22.1 ± 0.7                    | 92/92                       | 0.10                                | ne                                   |
|                       | 2. <sup>§</sup> | Control                       | 24.3 ± 1.1                  | 77/80                               |                                      |
|                       | <i>daf-16</i>   | 20.2 ± 0.4                    | 69/74                       | 0.0002                              | -16.8                                |
|                       | <i>cul-1</i>    | 22.6 ± 0.4                    | 63/73                       | 0.2                                 | -6.9                                 |
|                       | <i>skr-1</i>    | 25.0 ± 0.6                    | 49/50                       | 0.31                                | +2.8                                 |
|                       | <i>skr-2</i>    | 23.2 ± 0.6                    | 70/73                       | 0.06                                | -4.5                                 |
| 3. <sup>**</sup> , ¶  | Control         | 23.2 ± 0.4                    | 86/87                       |                                     |                                      |
|                       | <i>daf-16</i>   | 17.8 ± 0.4                    | 79/84                       | <0.0001                             | -23.2                                |
|                       | <i>cul-1</i>    | 23.9 ± 0.3                    | 74/76                       | 0.4                                 | +3.0                                 |
|                       | <i>skr-1</i>    | 21.6 ± 0.7                    | 70/86                       | 0.73                                | -6.8                                 |
| <b>daf-2(e1370)</b>   |                 |                               |                             |                                     |                                      |
| 1. ¶                  | Control         | 40.8 ± 1.0                    | 72/89                       |                                     |                                      |
|                       | <i>daf-16</i>   | 22.7 ± 0.5                    | 67/90                       | <0.0001                             | -44.3                                |
|                       | <i>cul-1</i>    | 31.1 ± 0.9                    | 77/83                       | <0.0001                             | -23.7                                |
|                       | <i>skr-1</i>    | 32.6 ± 1.2                    | 88/88                       | <0.0001                             | -20.0                                |
|                       | <i>skr-2</i>    | 30.5 ± 0.6                    | 73/88                       | <0.0001                             | -25.2                                |
|                       | 2.              | Control                       | 54.8 ± 1.2                  | 104/121                             |                                      |
|                       | <i>daf-16</i>   | 24.9 ± 0.4                    | 100/117                     | <0.0001                             | -54.5                                |
|                       | <i>cul-1</i>    | 32.8 ± 0.8                    | 85/90                       | <0.0001                             | -40.1                                |
|                       | <i>skr-1</i>    | 37.4 ± 0.7                    | 121/121                     | <0.0001                             | -31.7                                |
|                       | <i>skr-2</i>    | 37.1 ± 0.7                    | 104/118                     | <0.0001                             | -32.2                                |
| <b>daf-2(e1368)</b>   |                 |                               |                             |                                     |                                      |
| 1. ¶                  | Control         | 32.7 ± 0.7                    | 58/105                      |                                     |                                      |
|                       | <i>daf-16</i>   | 22.1 ± 0.3                    | 76/105                      | <0.0001                             | -32.4                                |
|                       | <i>cul-1</i>    | 25.1 ± 0.4                    | 69/104                      | <0.0001                             | -23.2                                |
|                       | <i>skr-1</i>    | 25.5 ± 0.7                    | 62/105                      | <0.0001                             | -22.0                                |
|                       | <i>skr-2</i>    | 25.7 ± 0.6                    | 57/105                      | <0.0001                             | -21.4                                |
|                       |                 |                               |                             |                                     |                                      |

| Trial                       | Gene                 | Mean Lifespan<br>± SEM (days) | Events/<br>Obs <sup>*</sup> | P value<br>Vs. Control <sup>†</sup> | % effect on<br>lifespan <sup>‡‡</sup> |
|-----------------------------|----------------------|-------------------------------|-----------------------------|-------------------------------------|---------------------------------------|
| <b><i>eat-2(ad1116)</i></b> |                      |                               |                             |                                     |                                       |
| <b>1.</b> <sup>¶‡</sup>     | <b>Control</b>       | 27.3 ± 0.6                    | 70/96                       |                                     |                                       |
|                             | <b><i>daf-16</i></b> | 24.7 ± 0.6                    | 68/96                       | 0.005                               | -9.5                                  |
|                             | <b><i>cul-1</i></b>  | 25.2 ± 0.5                    | 77/102                      | 0.2                                 | +7.6                                  |
|                             | <b><i>skr-1</i></b>  | 23.8 ± 1.1                    | 66/94                       | 0.2                                 | -12.8                                 |
|                             | <b><i>skr-2</i></b>  | 27.3 ± 0.6                    | 67/93                       | 0.8                                 | ne                                    |
|                             |                      |                               |                             |                                     |                                       |
| <b>2.</b>                   | <b>Control</b>       | 26.4 ± 0.7                    | 68/104                      |                                     |                                       |
|                             | <b><i>daf-16</i></b> | 24.8 ± 0.6                    | 37/103                      | 0.04                                | -6.0                                  |
|                             | <b><i>cul-1</i></b>  | 26.2 ± 0.6                    | 81/110                      | 0.9                                 | ne                                    |
|                             | <b><i>skr-1</i></b>  | 26.7 ± 0.6                    | 86/106                      | 0.5                                 | -1.1                                  |
|                             | <b><i>skr-2</i></b>  | 25.9 ± 0.6                    | 80/114                      | 0.6                                 | -1.8                                  |
|                             |                      |                               |                             |                                     |                                       |

\* Some animals were censored as described in Materials and Methods.

† Control refers to worms exposed to empty vector plasmid without an RNAi insert.

‡‡ Increase (+) or decrease (-) in lifespan with respect to the lifespan of worms grown on empty control vector.

§<sup>\*\*</sup>, †† Lifespans conducted in parallel.

¶ Experiment depicted in Fig. 1.

‡ Experiment depicted in Fig. 3.

ne: no effect.

*cul-1* and *skr-1/2* RNAi resulted in the production of dead F1 eggs in all experiments where applicable, as would be expected from successful downregulation of the gene(s) by the RNAi treatment.
