# Supplementary material
Source: PubMed Central journal article supplement (PMC1851597)
Supplement: pnas_0700638104_6.pdf [file pnas_0700638104_6.pdf]

**Table 3: Lifespans of gonad-ablated *daf-2(e1368)* mutants grown on *cul-1* RNAi**

| Trial | Genotype<br>Gonad ablation status                  | RNAi<br>treatment | Mean<br>Lifespan $\pm$<br>SEM (days) | Events/Obs<br>(trials)* | P value<br>vs.<br>Control† |
|-------|----------------------------------------------------|-------------------|--------------------------------------|-------------------------|----------------------------|
| 1. ‡  | <i>daf-2(e1368)</i><br><b>Z1, Z4 ablated</b>       | Control†          | 32.6 $\pm$ 1.4                       | 43/43                   |                            |
|       |                                                    | <i>daf-16</i>     | 18.2 $\pm$ 0.3                       | 30/30                   | <0.0001                    |
|       |                                                    | <i>cul-1</i>      | 23.0 $\pm$ 0.6                       | 54/54                   | <0.0001                    |
|       | <i>daf-2(e1368)</i><br><b>Intact gonad control</b> | Control†          | 31.4 $\pm$ 1.0                       | 35/43                   |                            |
|       |                                                    | <i>daf-16</i>     | 20.8 $\pm$ 0.5                       | 40/45                   | <0.0001                    |
|       |                                                    | <i>cul-1</i>      | 23.1 $\pm$ 0.9                       | 39/45                   | <0.0001                    |
| 2.    | <i>daf-2(e1368)</i><br><b>Z1, Z4 ablated</b>       | Control†          | 36.9 $\pm$ 1.6                       | 32/32                   |                            |
|       |                                                    | <i>daf-16</i>     | 16.3 $\pm$ 0.5                       | 15/15                   | <0.0001                    |
|       |                                                    | <i>cul-1</i>      | 27.5 $\pm$ 0.8                       | 35/36                   | <0.0001                    |
|       | <i>daf-2(e1368)</i><br><b>Intact gonad control</b> | Control†          | 30.5 $\pm$ 0.9                       | 53/86                   |                            |
|       |                                                    | <i>daf-16</i>     | 20.6 $\pm$ 0.4                       | 76/92                   | <0.0001                    |
|       |                                                    | <i>cul-1</i>      | 24.8 $\pm$ 0.7                       | 73/88                   | <0.0001                    |
| 3.    | <i>daf-2(e1368)</i><br><b>Z1, Z4 ablated</b>       | Control†          | 30.5 $\pm$ 0.9                       | 21/21                   |                            |
|       |                                                    | <i>cul-1</i>      | 24.8 $\pm$ 0.7                       | 22/22                   | <0.0001                    |
|       | <i>daf-2(e1368)</i><br><b>Intact gonad control</b> | Control†          | 39.1 $\pm$ 2.2                       | 54/91                   |                            |
|       |                                                    | <i>cul-1</i>      | 26.7 $\pm$ 1.0                       | 55/83                   | <0.0001                    |

\* Some animals were censored as described in Materials and Methods.

† Control refers to worms exposed to empty vector plasmid without an RNAi insert (see Materials and Methods).

‡ Experiment depicted in Fig. 1.

In each trial control worms with intact gonads were simultaneously subjected to the same treatment as the experimental ones, except Z1, Z4 ablation. Lifespans of the two groups were performed in parallel.
