# Supplementary material
Source: PubMed Central journal article supplement (PMC1851597)
Supplement: pnas_0700638104_7.pdf [file pnas_0700638104_7.pdf]

**Table 4: Effect of RNAi-depletion of individual *skr* genes on the lifespans of long-lived mutants and wild-type worms**

| Trial                        | Gene                        | Cosmid   | Mean Lifespan<br>± SEM (days) | Events/<br>Obs <sup>*</sup> | P value vs.<br>control <sup>†</sup> | % effect on<br>lifespan <sup>‡</sup> |
|------------------------------|-----------------------------|----------|-------------------------------|-----------------------------|-------------------------------------|--------------------------------------|
| <b><i>daf-2(mu150)</i></b>   |                             |          |                               |                             |                                     |                                      |
| 1. <sup>§</sup>              | Control <sup>  </sup>       |          | 33.4 ± 0.7                    | 89/90                       |                                     |                                      |
|                              | <i>daf-16</i> <sup>  </sup> |          | 17.3 ± 0.5                    | 80/83                       | <0.0001                             | -48.0                                |
|                              | <i>skr-1</i> <sup>  </sup>  | F46A9.5  | 22.0 ± 0.5                    | 88/91                       | <.0001                              | -34.1                                |
|                              | <i>skr-2</i> <sup>  </sup>  | F46A9.4  | 22.8 ± 0.4                    | 92/92                       | <.0001                              | -31.7                                |
|                              | <i>skr-3</i>                | F44G3.6  | 30.0 ± 0.4                    | 80/88                       | 0.49                                | -10.1                                |
|                              | <i>skr-5</i>                | F47H4.10 | 28.8 ± 0.7                    | 89/90                       | <.0001                              | -13.7                                |
|                              | <i>skr-7</i>                | Y47D7A.1 | 33.5 ± 0.6                    | 89/91                       | .81                                 | ne                                   |
|                              | <i>skr-8</i>                | C52D10.9 | 34.5 ± 0.6                    | 96/98                       | .18                                 | +3.2                                 |
|                              | <i>skr-11</i>               | F13A7.9  | 31.4 ± 0.9                    | 83/86                       | .22                                 | -5.9                                 |
|                              | <i>skr-12</i>               | C52D10.6 | 34.7 ± 0.7                    | 88/90                       | .13                                 | +3.8                                 |
|                              | <i>skr-13</i>               | C52D10.8 | 33.8 ± 1.1                    | 37/90                       | .50                                 | +1.1                                 |
|                              | <i>skr-15</i>               | F54D10.1 | 29.7 ± 0.9                    | 89/90                       | .003                                | -11.0                                |
|                              | <i>skr-19</i>               | R12H7.3  | 33.2 ± 0.6                    | 83/83                       | .54                                 | ne                                   |
|                              | <i>skr-20</i>               | R12H7.5  | 33.3 ± 0.7                    | 93/93                       | .75                                 | ne                                   |
| 2.                           | Control                     |          | 28.9 ± 0.6                    | 68/90                       |                                     |                                      |
|                              | <i>daf-16</i>               |          | 15.6 ± 0.4                    | 87/89                       | <0.0001                             | -46.0                                |
|                              | <i>skr-1</i>                | F46A9.5  | 22.7 ± 0.4                    | 72/85                       | <.0001                              | -21.4                                |
|                              | <i>skr-2</i>                | F46A9.4  | 16.0 ± 0.3                    | 85/90                       | <.0001                              | -44.6                                |
|                              | <i>skr-3</i>                | F44G3.6  | 28.2 ± 0.5                    | 88/90                       | 0.31                                | -2.4                                 |
|                              | <i>skr-5</i>                | F47H4.10 | nt                            |                             |                                     |                                      |
|                              | <i>skr-7</i>                | Y47D7A.1 | 26.3 ± 0.5                    | 86/89                       | 0.002                               | -8.9                                 |
|                              | <i>skr-8</i>                | C52D10.9 | 27.7 ± 0.7                    | 84/90                       | 0.78                                | -4.1                                 |
|                              | <i>skr-11</i>               | F13A7.9  | 25.3 ± 0.7                    | 73/90                       | 0.001                               | -12.4                                |
|                              | <i>skr-12</i>               | C52D10.6 | 27.4 ± 0.6                    | 83/90                       | 0.18                                | -5.1                                 |
|                              | <i>skr-13</i>               | C52D10.8 | 26.1 ± 0.4                    | 84/88                       | <.0001                              | -9.6                                 |
|                              | <i>skr-15</i>               | F54D10.1 | nt                            |                             |                                     |                                      |
|                              | <i>skr-19</i>               | R12H7.3  | 27.1 ± 0.6                    | 84/93                       | 0.09                                | -6.2                                 |
|                              | <i>skr-20</i>               | R12H7.5  | 26.3 ± 0.7                    | 57/63                       | 0.007                               | -8.9                                 |
| <b><i>glp-1(e2141ts)</i></b> |                             |          |                               |                             |                                     |                                      |
| 1. <sup>§</sup>              | Control                     |          | 24.3 ± 1.1                    | 77/80                       |                                     |                                      |
|                              | <i>daf-16</i>               |          | 20.2 ± 0.4                    | 69/74                       | <0.0001                             | -16.8                                |
|                              | <i>skr-1</i>                | F46A9.5  | 25.0 ± 0.6                    | 49/50                       | 0.31                                | ne                                   |
|                              | <i>skr-2</i>                | F46A9.4  | 23.2 ± 0.6                    | 70/73                       | 0.06                                | -4.5                                 |
|                              | <i>skr-3</i>                | F44G3.6  | 29.3 ± 0.5                    | 60/73                       | 0.0008                              | +20.5                                |
|                              | <i>skr-5</i>                | F47H4.10 | 27.1 ± 1.0                    | 71/75                       | 0.21                                | +11.5                                |
|                              | <i>skr-7</i>                | Y47D7A.1 | 28.5 ± 1.0                    | 70/75                       | 0.01                                | +17.2                                |
|                              | <i>skr-8</i>                | C52D10.9 | 25.3 ± 1.0                    | 67/72                       | 0.87                                | +4.1                                 |
|                              | <i>skr-11</i>               | F13A7.9  | 26.4 ± 0.5                    | 70/75                       | 0.38                                | +8.6                                 |
|                              | <i>skr-12</i>               | C52D10.6 | 32.6 ± 1.2                    | 62/76                       | <0.0001                             | +34.1                                |

| Trial     | Gene                        | Cosmid   | Mean Lifespan<br>± SEM (days) | Events/<br>Obs* | P value vs.<br>control† | % effect on<br>lifespan‡ |
|-----------|-----------------------------|----------|-------------------------------|-----------------|-------------------------|--------------------------|
|           | <i>skr-13</i>               | C52D10.8 | 29.9 ± 0.5                    | 70/75           | 0.01                    | +23.0                    |
|           | <i>skr-15</i>               | F54D10.1 | 25.9 ± 1.4                    | 68/75           | 0.14                    | +6.5                     |
|           | <i>skr-19</i>               | R12H7.3  | 30.1 ± 1.3                    | 71/76           | 0.0009                  | +23.8                    |
|           | <i>skr-20</i>               | R12H7.5  | 30.3 ± 1.2                    | 71/77           | 0.0017                  | +24.6                    |
| <b>2.</b> | <i>Control</i>              |          | 23.2 ± 0.4                    | 86/87           |                         |                          |
|           | <i>daf-16</i>               |          | 17.8 ± 0.4                    | 79/84           | <.0001                  | -23.2                    |
|           | <i>skr-1</i>                | F46A9.5  | 21.6 ± 0.7                    | 70/86           | .73                     | -6.8                     |
|           | <i>skr-2</i>                | F46A9.4  | nt                            |                 |                         |                          |
|           | <i>skr-3</i>                | F44G3.6  | 25.5 ± 0.9                    | 66/89           | <.0001                  | +9.9                     |
|           | <i>skr-5</i>                | F47H4.10 | nt                            |                 |                         |                          |
|           | <i>skr-7</i>                | Y47D7A.1 | 26.4 ± 0.8                    | 76/88           | <.0001                  | +13.7                    |
|           | <i>skr-8</i>                | C52D10.9 | 24.5 ± 0.6                    | 86/88           | .0004                   | +5.6                     |
|           | <i>skr-11</i>               | F13A7.9  | 27.1 ± 0.9                    | 73/83           | <.0001                  | +16.8                    |
|           | <i>skr-12</i>               | C52D10.6 | 25.2 ± 0.8                    | 73/80           | <.0001                  | +8.6                     |
|           | <i>skr-13</i>               | C52D10.8 | 25.1 ± 0.9                    | 73/83           | <.0001                  | +8.1                     |
|           | <i>skr-15</i>               | F54D10.1 | 26.5 ± 0.8                    | 70/83           | 0.0855                  | +14.2                    |
|           | <i>skr-19</i>               | R12H7.3  | 27.1 ± 0.9                    | 83/89           | <.0001                  | +16.8                    |
|           | <i>skr-20</i>               | R12H7.5  | 22.9 ± 0.6                    | 85/88           | .04                     | -1.2                     |
| <b>N2</b> |                             |          |                               |                 |                         |                          |
| <b>1.</b> | <i>Control</i> <sup>¶</sup> |          | 20.7 ± 0.7                    | 67/88           |                         |                          |
|           | <i>daf-16</i> <sup>¶</sup>  |          | 16.6 ± 0.5                    | 67/87           |                         | -19.8                    |
|           | <i>skr-1</i> <sup>¶</sup>   | F46A9.5  | 20.7 ± 0.7                    | 82/86           | 0.71                    | ne                       |
|           | <i>skr-2</i> <sup>¶</sup>   | F46A9.4  | 21.4 ± 0.9                    | 67/81           | 0.19                    | +3.3                     |
|           | <i>skr-5</i>                | F44G3.6  | 23.0 ± 0.7                    | 77/87           | 0.005                   | +11.1                    |
|           | <i>skr-7</i>                | F47H4.10 | 19.0 ± 0.6                    | 67/83           | 0.13                    | -8.2                     |
|           | <i>Control</i>              |          | 18.0 ± 0.5                    | 67/89           |                         |                          |
|           | <i>daf-16</i>               |          | 15.9 ± 0.5                    | 63/90           | 0.0006                  | -11.6                    |
|           | <i>skr-8</i>                | C52D10.9 | 17.8 ± 0.6                    | 60/90           | 0.59                    | -1.1                     |
|           | <i>skr-11</i>               | F13A7.9  | 18.0 ± 0.5                    | 69/91           | 0.6                     | ne                       |
|           | <i>skr-12</i>               | C52D10.6 | 19.0 ± 0.6                    | 47/76           | 0.17                    | +5.5                     |
|           | <i>skr-13</i>               | C52D10.8 | 19.1 ± 0.6                    | 65/89           | 0.09                    | +6.1                     |
|           | <i>skr-15</i>               | F54D10.1 | 17.6 ± 0.6                    | 61/90           | 0.99                    | -2.2                     |
|           | <i>skr-19</i>               | R12H7.3  | 18.3 ± 0.6                    | 55/83           | 0.5                     | +1.6                     |
|           | <i>skr-20</i>               | R12H7.5  | 18.0 ± 0.7                    | 66/89           | 0.49                    | ne                       |

\* Some animals were censored as described in Material and Methods.

† Control refers to worms exposed to empty vector plasmid without an RNAi insert.

‡ suppression (-) or extension (+) of lifespan compared to control worms grown on empty vector alone.

§ Lifespans conducted in parallel.

¶ Experiment depicted in Fig. 3.

nt: not tested.

ne: no effect

Of the 21 predicted *skr* gene family members, we could not test some because the RNAi clones were not available in the feeding RNAi library described in (1) (*skr-4*, *skr-6* and *skr-16*), or were found to be contaminated with clones targeting other genes (*skr-9*, *skr-10*, *skr-14*, *skr-17*, *skr-18* and *skr-21*). Of these, we could test *skr-9*, *skr-10* and *skr-21* using the respective clones from an alternative RNAi library (2) and found no discernable phenotypes (data not shown).

1. Kamath RS, Fraser AG, Dong Y, Poulin G, Durbin R, Gotta M, Kanapin A, Le Bot N, Moreno S, Sohrmann M, *et al.* (2003) *Nature* 421:231-237.
2. Lamesch P, Milstein S, Hao T, Rosenberg J, Li N, Sequerra R, Bosak S, Doucette-Stamm L, Vandenhaute J, Hill DE, *et al.* (2004) *Genome Res* 14:2064-2069.
