# Supplementary material
Source: PubMed Central journal article supplement (PMC1851597)

***daf-2(e1370); Psod-3::gfp***

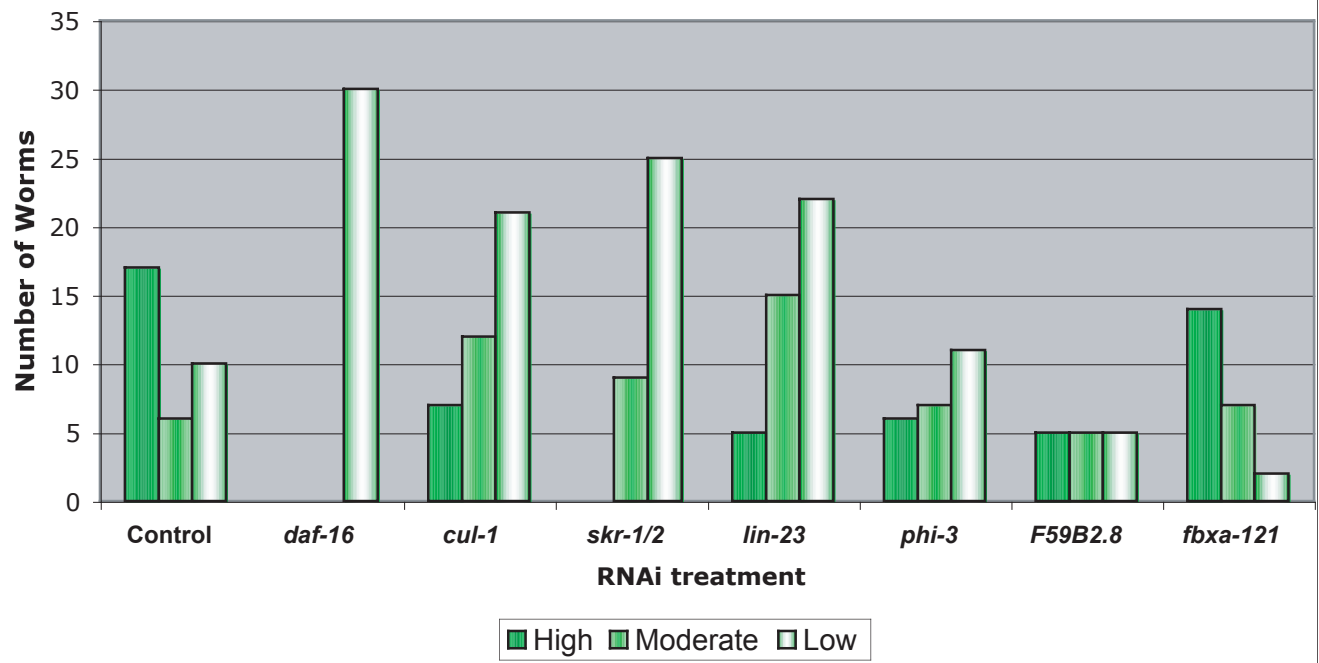

Supplement: pnas_0700638104_1.pdf [file pnas_0700638104_1.pdf]

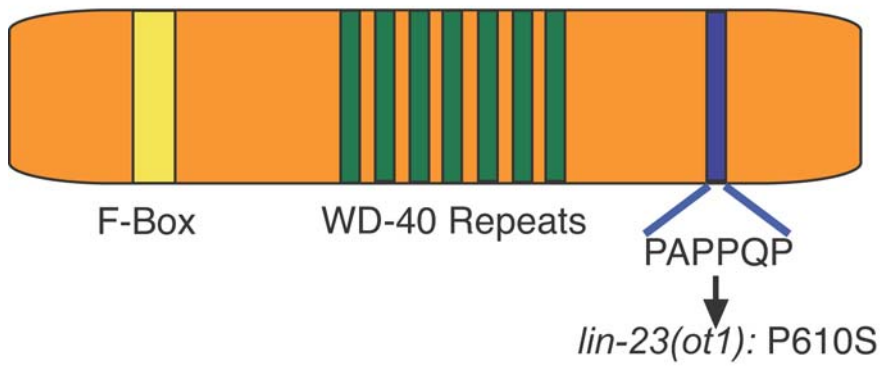

Supplement: pnas_0700638104_2.pdf [file pnas_0700638104_2.pdf]

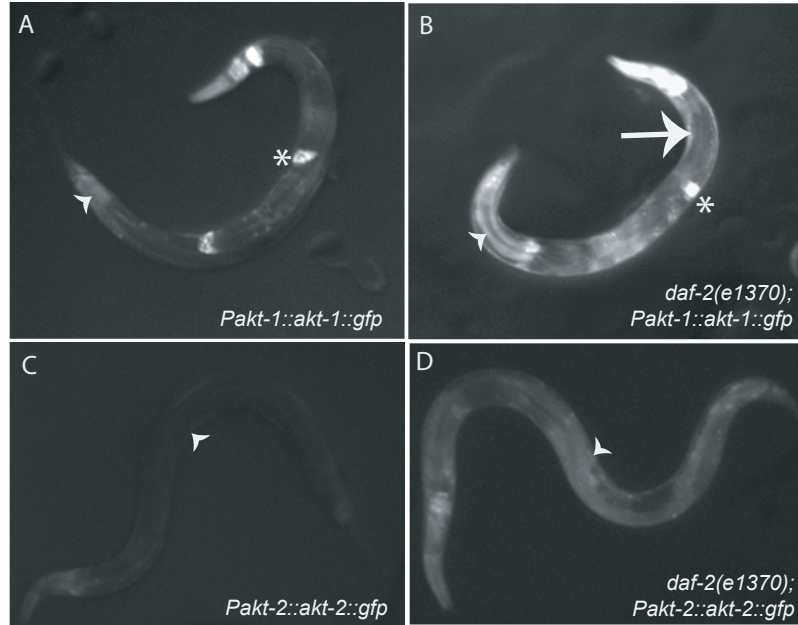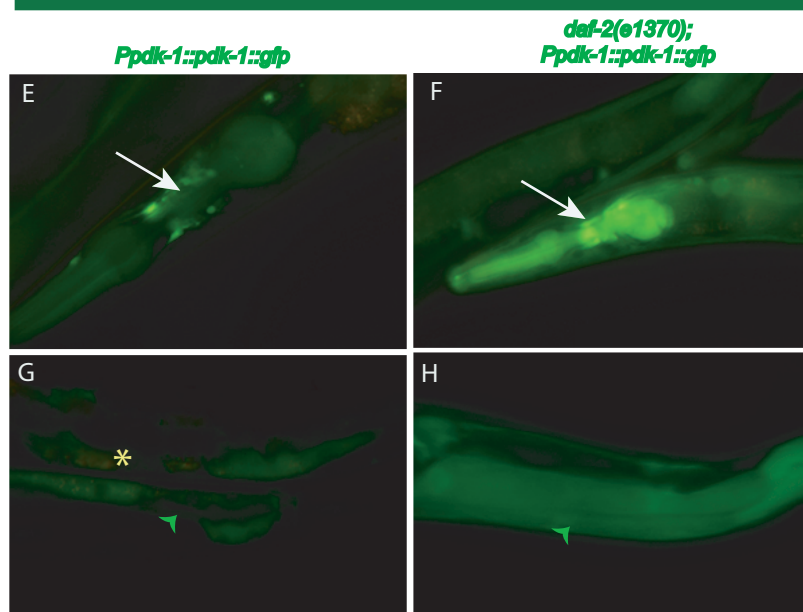

Supplement: pnas_0700638104_3.pdf [file pnas_0700638104_3.pdf]
